# Supplementary material
Source: Springer Nature journal article supplement (https://www.springermedizin.de/resource/supplementary/12933_2013_700_MOESM1_ESM.pdf/9538752)

**A**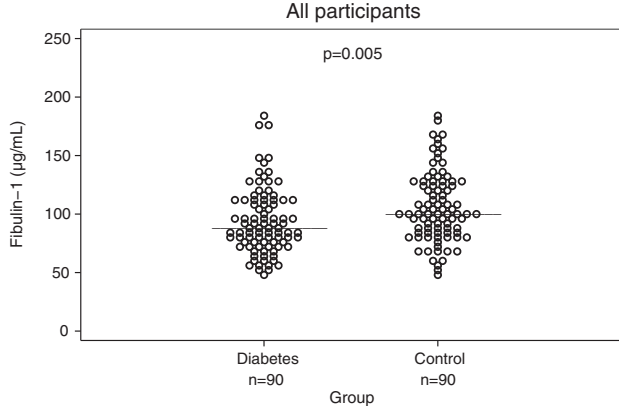**B**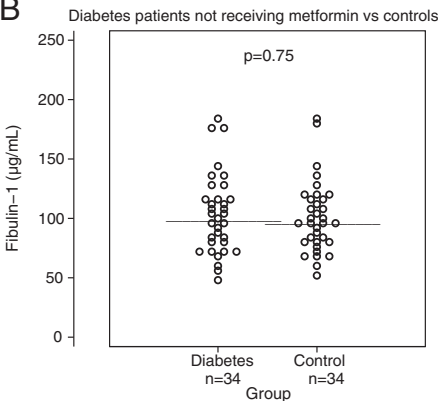**C**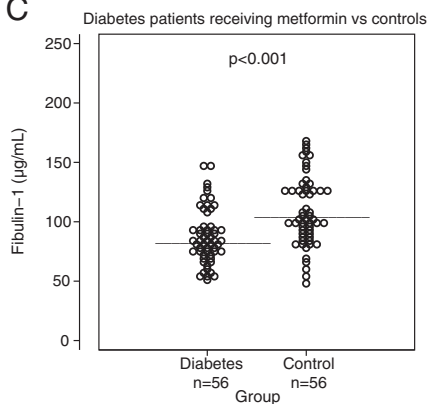

Supplement: MOESM1 [file 9538752]
